# Supplementary material for: Enhanced Photoelectrochemical Water Oxidation Using TiO2-Co3O4 p–n Heterostructures Derived from in Situ-Loaded ZIF-67
Source: MDPI journal article supplement (doi:10.3390/ma16155461), 2023-08-04
Supplement: s1 [file s1]

## **Supporting Information**

### **Enhanced photo-electrochemical water oxidation using TiO<sub>2</sub>-Co<sub>3</sub>O<sub>4</sub> p-n heterostructures derived from in situ-loaded ZIF-67**

#### **S1. General procedures**

##### **S1.1 Materials:**

All the chemicals were used directly without further purification. Hydrochloric acid (HCl, 35%) was purchased from OCI Company Ltd.; titanium butoxide (TBOT, 98%) was purchased from Sigma-Aldrich; 2-methylimidazole (2-Melm, 99%) was purchased from Acros Organics; cobalt (II) nitrate hexahydrate (Co(NO<sub>3</sub>)<sub>2</sub>·6H<sub>2</sub>O, 97%) was purchased from Shinyo Pure Chemical Company Ltd.; and sodium sulfate anhydrous (Na<sub>2</sub>SO<sub>4</sub>, 99%) was purchased from Duksan. Milli-Q water (MΩ 18) was used in all the experiments.

##### **S1.2. Characterization:**

The morphology and composition of the TiO<sub>2</sub>, TiO<sub>2</sub>-ZIF-67, and TiO<sub>2</sub> nanostructures with Co<sub>3</sub>O<sub>4</sub> were respectively studied using a field-emission scanning electron microscope (FESEM, S4800 Hitachi, Japan) and a field-emission transmission electron microscope (FETEM, Tecnai G2 F20, USA) attached to an energy dispersive spectrometer (EDS). The crystalline structures of the samples were acquired via X-ray diffraction (XRD; X'pert PRO MPD diffractometer, Netherlands) with a PANalytical X' Celerator detector and a Cu Kα (λ = 0.15406 nm) source. The absorption spectra of the newly developed materials were recorded on a Cary 5000 UV-Vis-NIR spectrophotometer (Agilent, USA). The surface elemental compositions and chemical states

were examined via X-ray photoelectron spectroscopy (XPS) using a K-Alpha spectrometer (Thermo Scientific, USA) equipped with a monochromatic Al-K $\alpha$  X-ray source.

### **S1.3. PEC tests:**

PEC tests were performed using an electrochemical workstation (Zive SP1, WonATech Co., Ltd., Korea) in an electrochemical cell with a three-electrode system: the as-prepared photoanode was used as the working electrode, a platinum mesh was used as the counter electrode, and an Ag/AgCl electrode (in 3 M KCl) placed in a Luggin capillary was used as the reference electrode. The PEC test and other electrochemical measurements were performed using electrodes placed at appropriate positions in a quartz electrochemical cell measuring 50 mm  $\times$  50 mm  $\times$  20 mm (Hellma, HE.700.000. OG20.) with 0.3 M Na<sub>2</sub>SO<sub>4</sub> (pH = 7) as the electrolyte. Linear sweep voltammetry (LSV) curves were recorded in a potential window ranging from -0.5 V to 1.3 V vs Ag/AgCl at a scan rate of 20 mV s<sup>-1</sup>. Electrochemical impedance spectroscopy (EIS) was performed in the frequency range from 10<sup>-2</sup> Hz to 10<sup>5</sup> Hz with an amplitude of 5 mV at a bias potential of 0 V vs. Ag/AgCl under solar simulator (AM 1.5G, 100 mW/cm<sup>2</sup>) irradiation. The incident photon-to-current conversion efficiency (IPCE) was measured at 1.23 V vs Ag/AgCl using a xenon arc lamp (75 W, Ushio UXL-75XE) filtered using a dual-grating monochromator and individual filters onto the test devices.

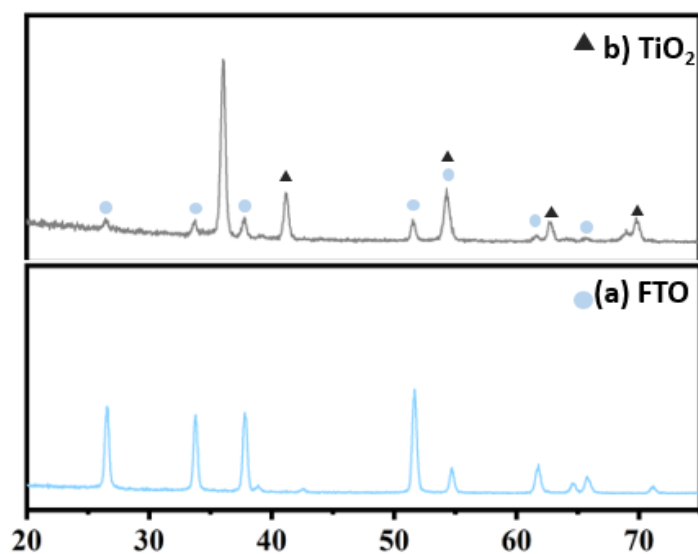

**Figure S1.** XRD diffraction patterns of (a) FTO(b) $\text{TiO}_2$

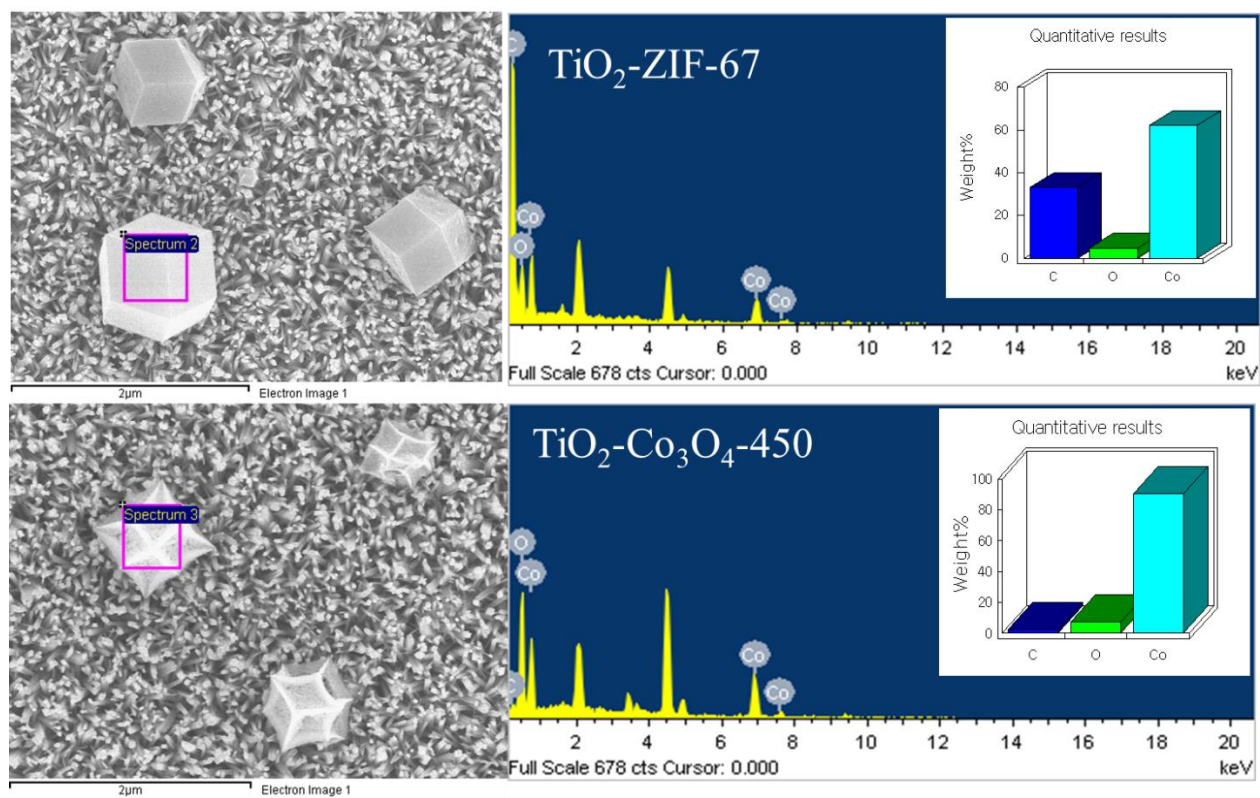

**Figure S2.** SEM-EDS analysis of ZIF-67 and  $\text{TiO}_2$ - $\text{Co}_3\text{O}_4$ -450.

**Table S1.**EDS-elemental ratio of ZIF-67 and TiO<sub>2</sub>-Co<sub>3</sub>O<sub>4</sub>-450

| Elements | ZIF-67  |         | Co <sub>3</sub> O <sub>4</sub> -450 |         |
|----------|---------|---------|-------------------------------------|---------|
|          | Weight% | Atomic% | Weight%                             | Atomic% |
| C        | 32.98   | 66.94   | 2.39                                | 9.09    |
| O        | 4.80    | 7.32    | 7.31                                | 20.89   |
| Co       | 62.21   | 25.74   | 90.30                               | 70.02   |

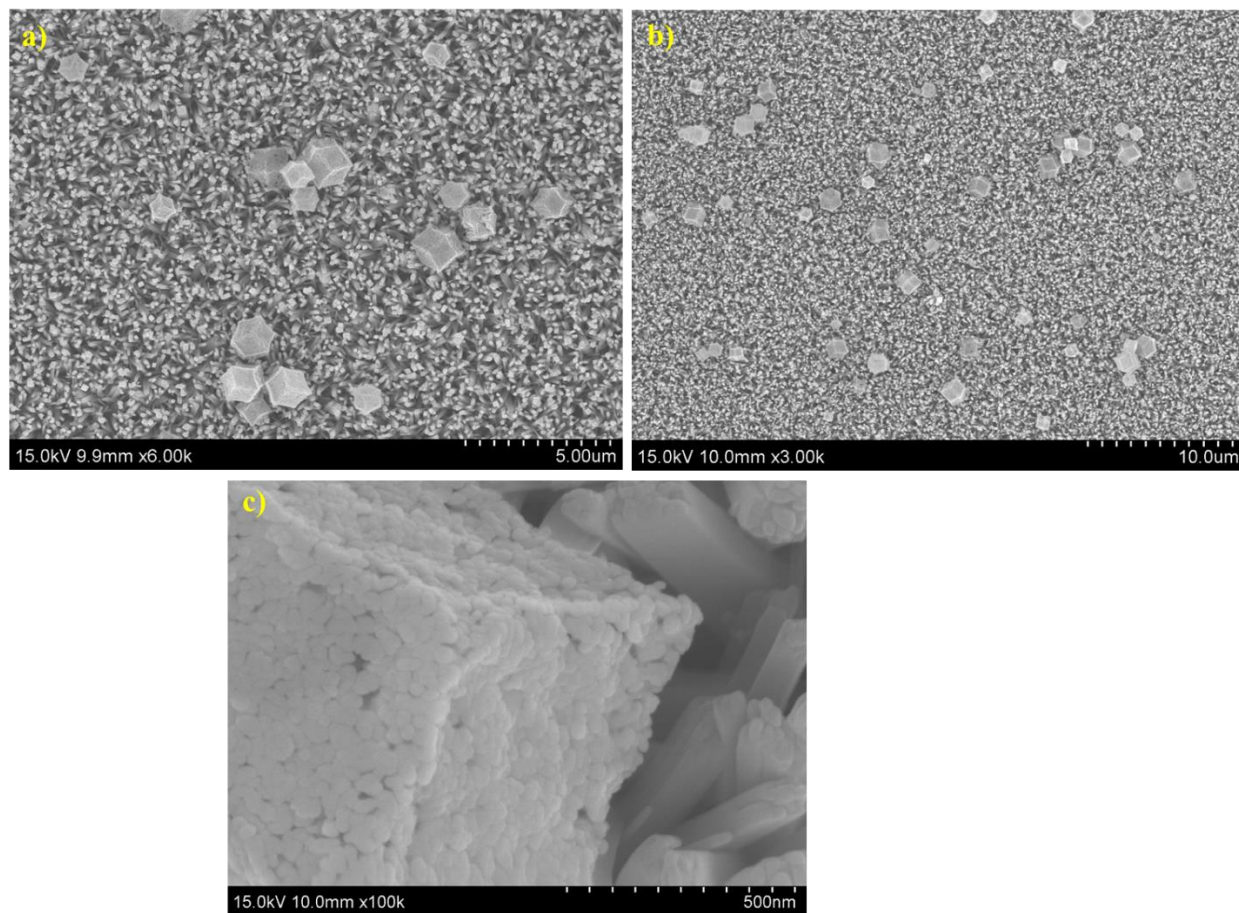

**Figure. S3.** SEM images of TiO<sub>2</sub>-Co<sub>3</sub>O<sub>4</sub>-450 sample after 1h stability test

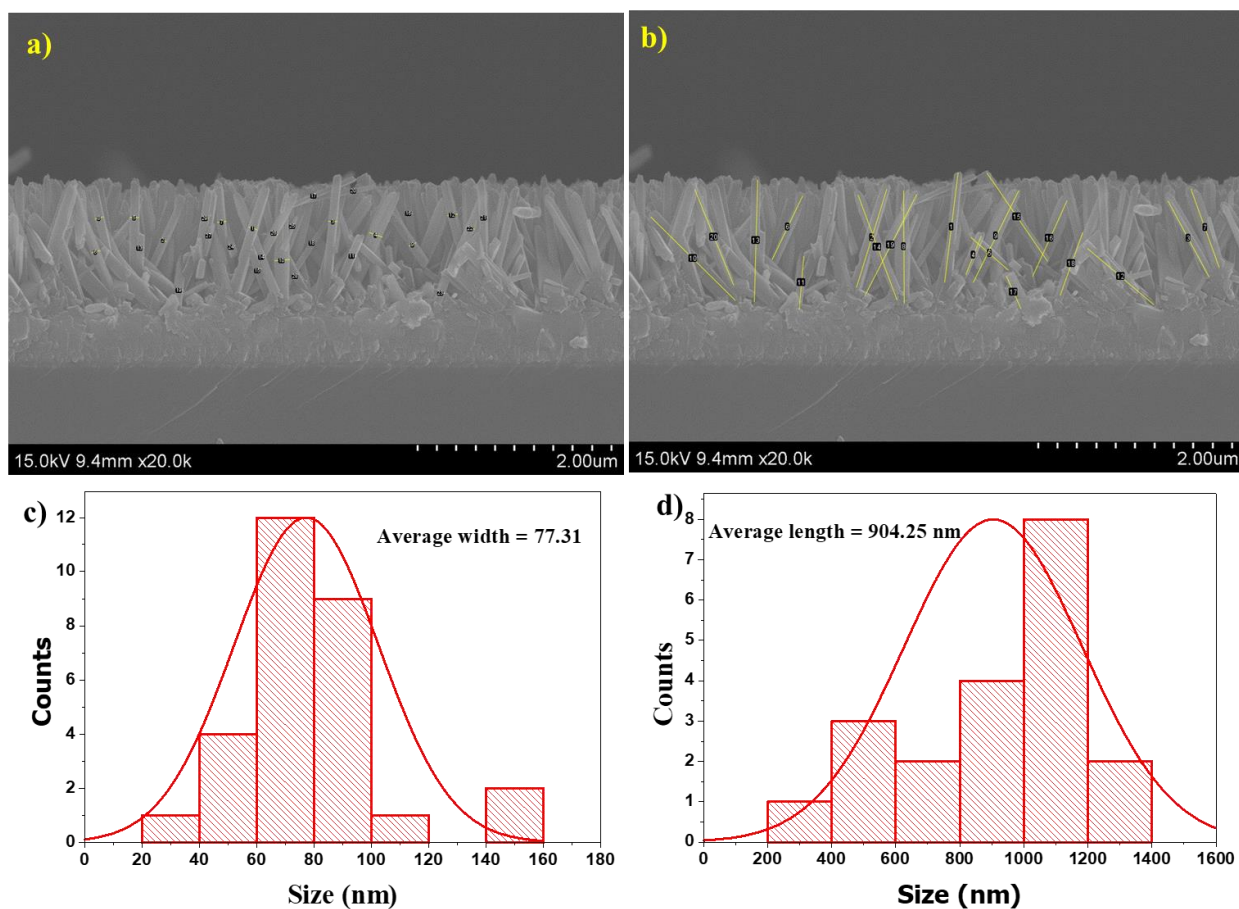

**Figure. S4.** The Sem and size distribution histogram of TiO<sub>2</sub> nanorod a,c) width of the TiO<sub>2</sub> b,d) Length of the TiO<sub>2</sub> nanorod.

**Table S2.** Comparative photoelectrochemical performance of selected TiO<sub>2</sub> or Co<sub>3</sub>O<sub>4</sub> nanocomposites

| Photoanode               | Electrolyte/illumination              | Photocurrent             | Applied bias<br>(V vs RHE) | Ref |
|--------------------------|---------------------------------------|--------------------------|----------------------------|-----|
| Ag/NH <sub>2</sub> -MIL- | 0.5 M Na <sub>2</sub> SO <sub>4</sub> | 1.06 mA cm <sup>-2</sup> | 1.23 V vs                  | [1] |

|                                                                                   |                                                                                      |                             |                  |           |
|-----------------------------------------------------------------------------------|--------------------------------------------------------------------------------------|-----------------------------|------------------|-----------|
| 125/TiO <sub>2</sub>                                                              | Electrolyte/300 W Xe lamp with 100 mWcm <sup>-2</sup>                                |                             | RHE              |           |
| Co <sub>3</sub> O <sub>4</sub> /TiO <sub>2</sub>                                  | 1 M NaOH (pH = 14) 300 W xenon lamp (100 mWcm <sup>-2</sup> )                        | 1.04 mA cm <sup>-2</sup>    | 1.23 V vs RHE    | [2]       |
| Co-MOF@TiFe.                                                                      | 1 M NaOH (pH=13.6)/ 100 mWcm <sup>-2</sup>                                           | 1.78 mA cm <sup>-2</sup>    | 1.23 V vs RHE    | [3]       |
| Co <sub>3</sub> O <sub>4</sub> /BiVO <sub>4</sub>                                 | 0.1M KPi buffer (pH7) 300 W Xe lamp with 100 mWcm <sup>-2</sup>                      | 2.71 mA cm <sup>-2</sup>    | 1.23 V vs RHE    | [4]       |
| Co <sub>3</sub> O <sub>4</sub> /P-C <sub>3</sub> N <sub>4</sub> /TiO <sub>2</sub> | 0.5 M Na <sub>2</sub> SO <sub>4</sub> / 150 W xenon lamp with 100 mWcm <sup>-2</sup> | 1.58 mA cm <sup>-2</sup>    | 1.23 V vs RHE    | [5]       |
| CoNi-MOFs/BiVO <sub>4</sub>                                                       | 0.5 M Na <sub>2</sub> SO <sub>4</sub> /100 mWcm <sup>-2</sup>                        | 3.2 mA cm <sup>-2</sup>     | 1.23 V vs. RHE   | [6]       |
| NiFe-MOF/TiO <sub>2</sub>                                                         | 0.5 M Na <sub>2</sub> SO <sub>4</sub> /100 mWcm <sup>-2</sup>                        | 0.77 mA cm <sup>-2</sup> at | 1.23 V (vs. RHE) | [7]       |
| TiO <sub>2</sub> -ZIF-67                                                          | 0.5 M Na <sub>2</sub> SO <sub>4</sub> /100 mWcm <sup>-2</sup>                        | 1.8 mA cm <sup>-2</sup>     | 1.85 V Vs RHE    | This work |
| TiO <sub>2</sub> -Co <sub>3</sub> O <sub>4</sub> -350                             | 0.5 M Na <sub>2</sub> SO <sub>4</sub> /100 mWcm <sup>-2</sup>                        | 2.1 mA cm <sup>-2</sup>     | 1.85 V Vs RHE    | This work |
| TiO <sub>2</sub> -Co <sub>3</sub> O <sub>4</sub> -450                             | 0.5 M Na <sub>2</sub> SO <sub>4</sub> /100 mWcm <sup>-2</sup>                        | 2.4 mA cm <sup>-2</sup>     | 1.85 V Vs RHE    | This work |
| TiO <sub>2</sub> -Co <sub>3</sub> O <sub>4</sub> -550                             | 0.5 M Na <sub>2</sub> SO <sub>4</sub> /100 mWcm <sup>-2</sup>                        | 2.2 mA cm <sup>-2</sup>     | 1.85 V Vs RHE    | This work |

## References

1. Cui, W.; Shang, J.; Bai, H.; Hu, J.; Xu, D.; Ding, J.; Fan, W.; Shi, W. In-situ implantation of plasmonic Ag into metal-organic frameworks for constructing efficient Ag/NH<sub>2</sub>-MIL-125/TiO<sub>2</sub> photoanode. *Chemical Engineering Journal* **2020**, 388, 124206.

2. Ding, Q.; Gou, L.; Wei, D.; Xu, D.; Fan, W.; Shi, W. Metal-organic framework derived Co<sub>3</sub>O<sub>4</sub>/TiO<sub>2</sub> heterostructure nanoarrays for promote photoelectrochemical water splitting. *International Journal of Hydrogen Energy* **2021**, *46*, 24965-24976.
3. Li, L.; Zhang, H.; Liu, C.; Liang, P.; Mitsuzaki, N.; Chen, Z. Effect of Co-Based Metal–Organic Framework Prepared by an In Situ Growth Method on the Photoelectrochemical Performance of Electrodeposited Hematite Photoanode. *Energy Technology* **2019**, *7*, 1801069, doi:<https://doi.org/10.1002/ente.201801069>.
4. Chang, X.; Wang, T.; Zhang, P.; Zhang, J.; Li, A.; Gong, J. Enhanced Surface Reaction Kinetics and Charge Separation of p–n Heterojunction Co<sub>3</sub>O<sub>4</sub>/BiVO<sub>4</sub> Photoanodes. *Journal of the American Chemical Society* **2015**, *137*, 8356-8359, doi:[10.1021/jacs.5b04186](https://doi.org/10.1021/jacs.5b04186).
5. Yu, Z.; Li, Y.; Qu, J.; Zheng, R.; Cairney, J.M.; Zhang, J.; Zhu, M.; Khan, A.; Li, W. Enhanced photoelectrochemical water-splitting performance with a hierarchical heterostructure: Co<sub>3</sub>O<sub>4</sub> nanodots anchored TiO<sub>2</sub>@P-C<sub>3</sub>N<sub>4</sub> core-shell nanorod arrays. *Chemical Engineering Journal* **2021**, *404*, 126458, doi:<https://doi.org/10.1016/j.cej.2020.126458>.
6. Zhou, S.; Chen, K.; Huang, J.; Wang, L.; Zhang, M.; Bai, B.; Liu, H.; Wang, Q. Preparation of heterometallic CoNi-MOFs-modified BiVO<sub>4</sub>: a steady photoanode for improved performance in photoelectrochemical water splitting. *Applied Catalysis B: Environmental* **2020**, *266*, 118513.
7. Cui, W.; Bai, H.; Shang, J.; Wang, F.; Xu, D.; Ding, J.; Fan, W.; Shi, W. Organic-inorganic hybrid-photoanode built from NiFe-MOF and TiO<sub>2</sub> for efficient PEC water splitting. *Electrochimica Acta* **2020**, *349*, 136383, doi:<https://doi.org/10.1016/j.electacta.2020.136383>.
